# Supplementary material for: Base-Mediated One-Pot Synthesis of Aliphatic Diazirines for Photoaffinity Labeling
Source: MDPI journal article supplement (doi:10.3390/molecules22081389), 2017-08-22

## Supporting Information

# **Base-Mediated One-Pot Synthesis of Aliphatic Diazirines for Photoaffinity Labeling**

Lei Wang <sup>†</sup>, Zetryana Puteri Tachrim, Natsumi Kurokawa, Fumina Ohashi, Yasuko Sakihama,  
Yasuyuki Hashidoko and Makoto Hashimoto <sup>\*</sup>

Division of Applied Bioscience, Graduate School of Agriculture, Hokkaido University, Kita 9, Nishi 9,  
Kita-ku, Sapporo 060-8589, Japan.

<sup>†</sup>Present address: Center for Drug Design, Academic Health Center, University of Minnesota, Minneapolis,  
Minnesota 55455, United States.

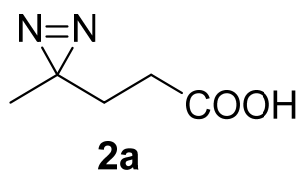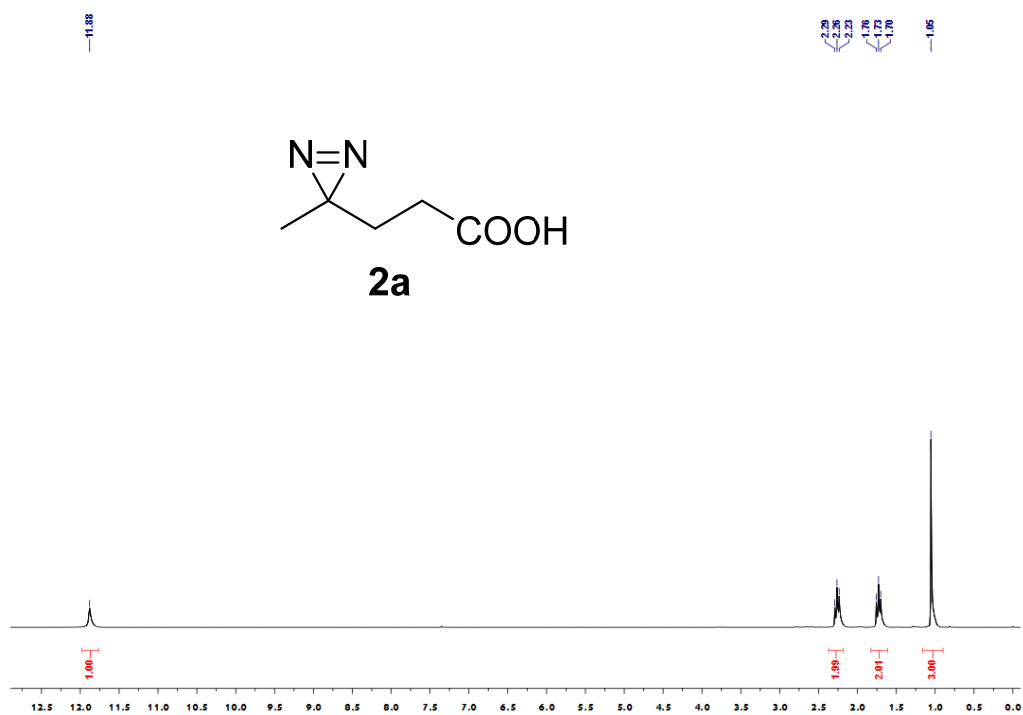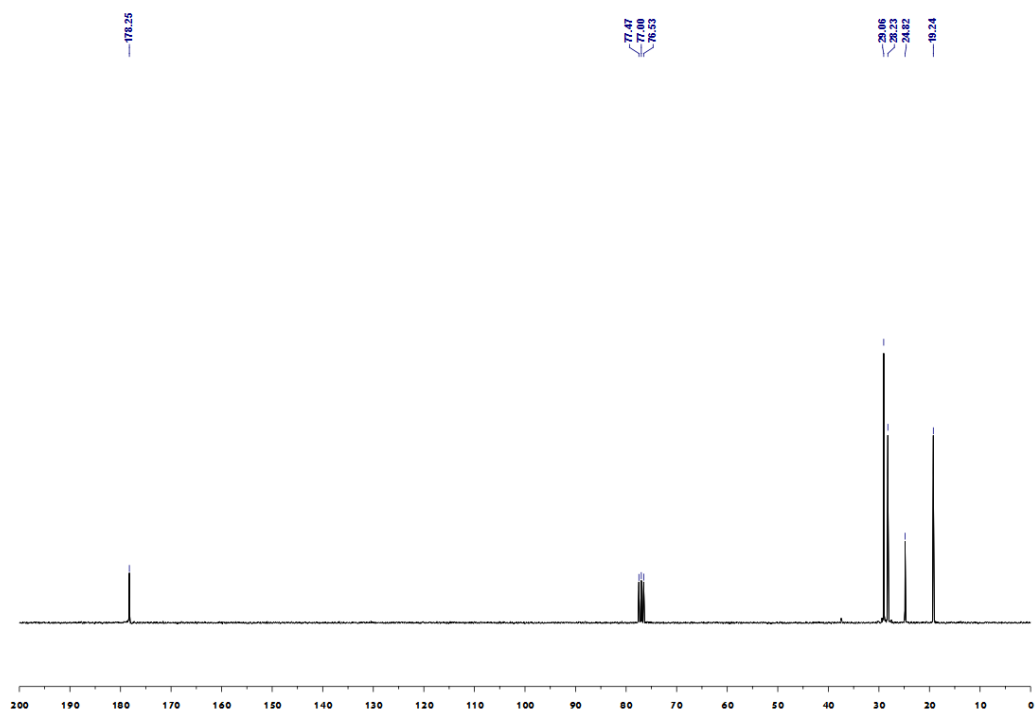

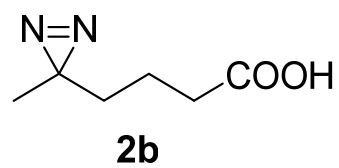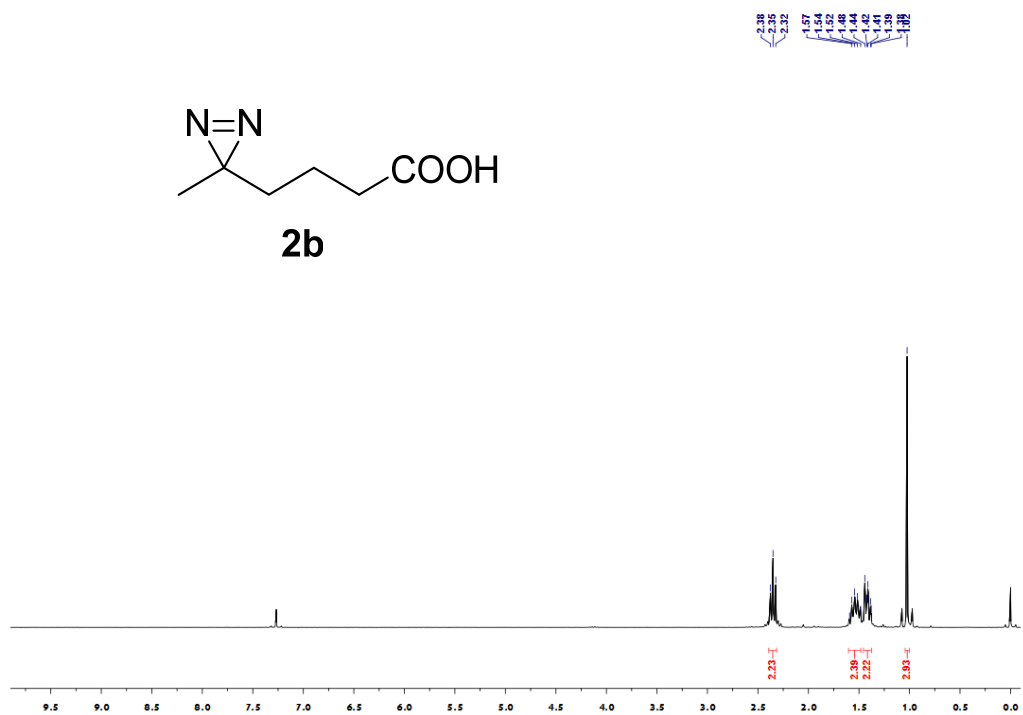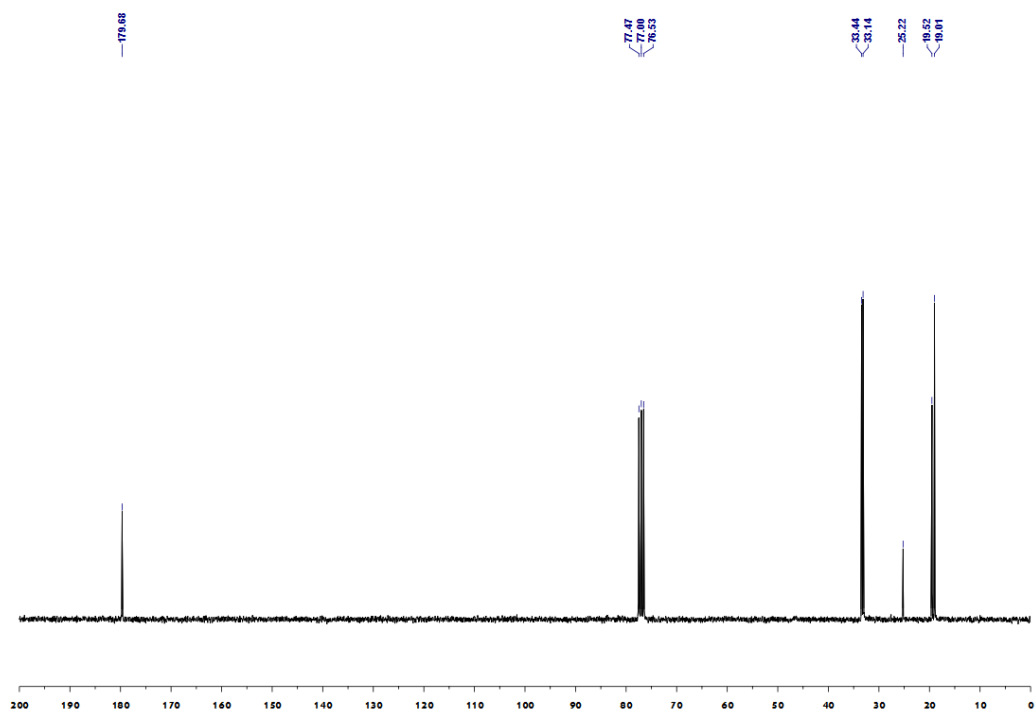

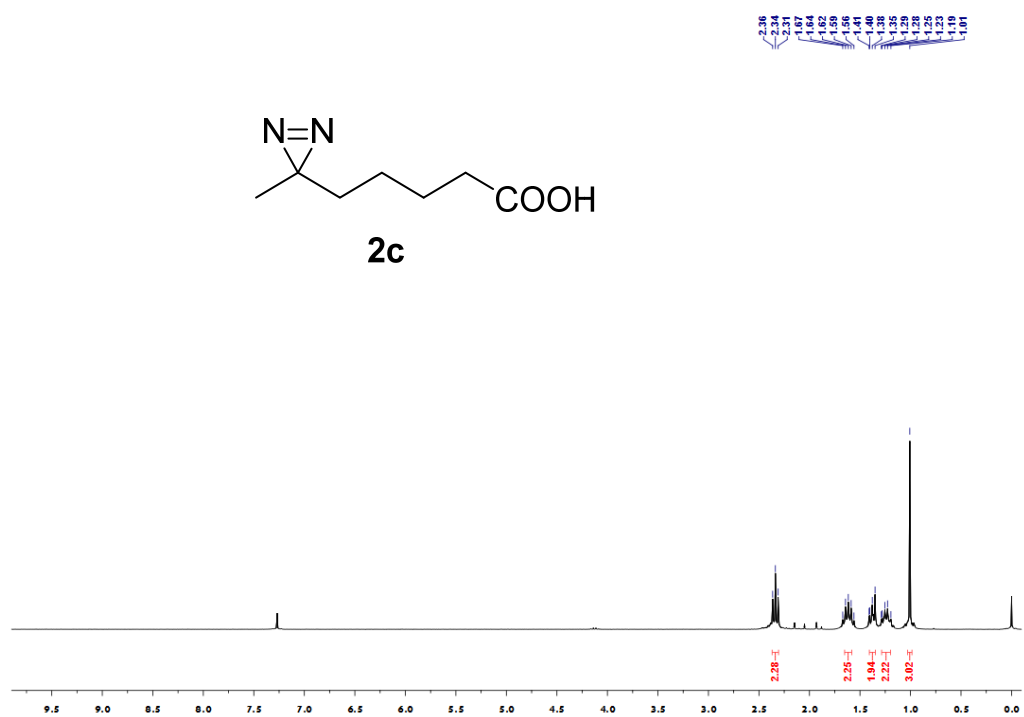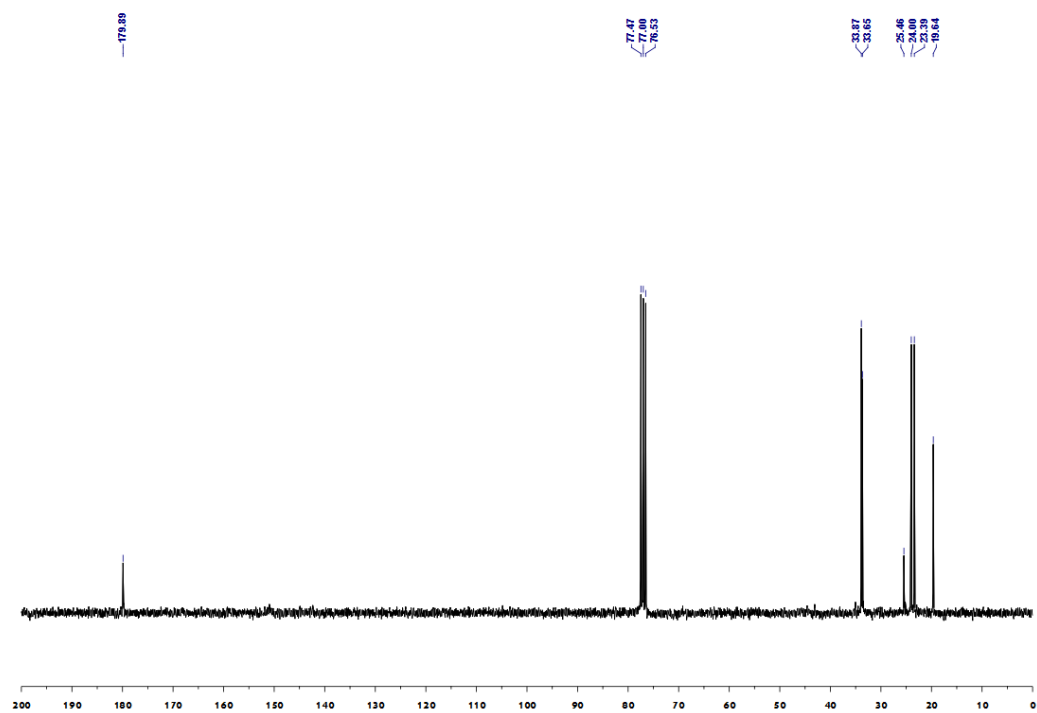

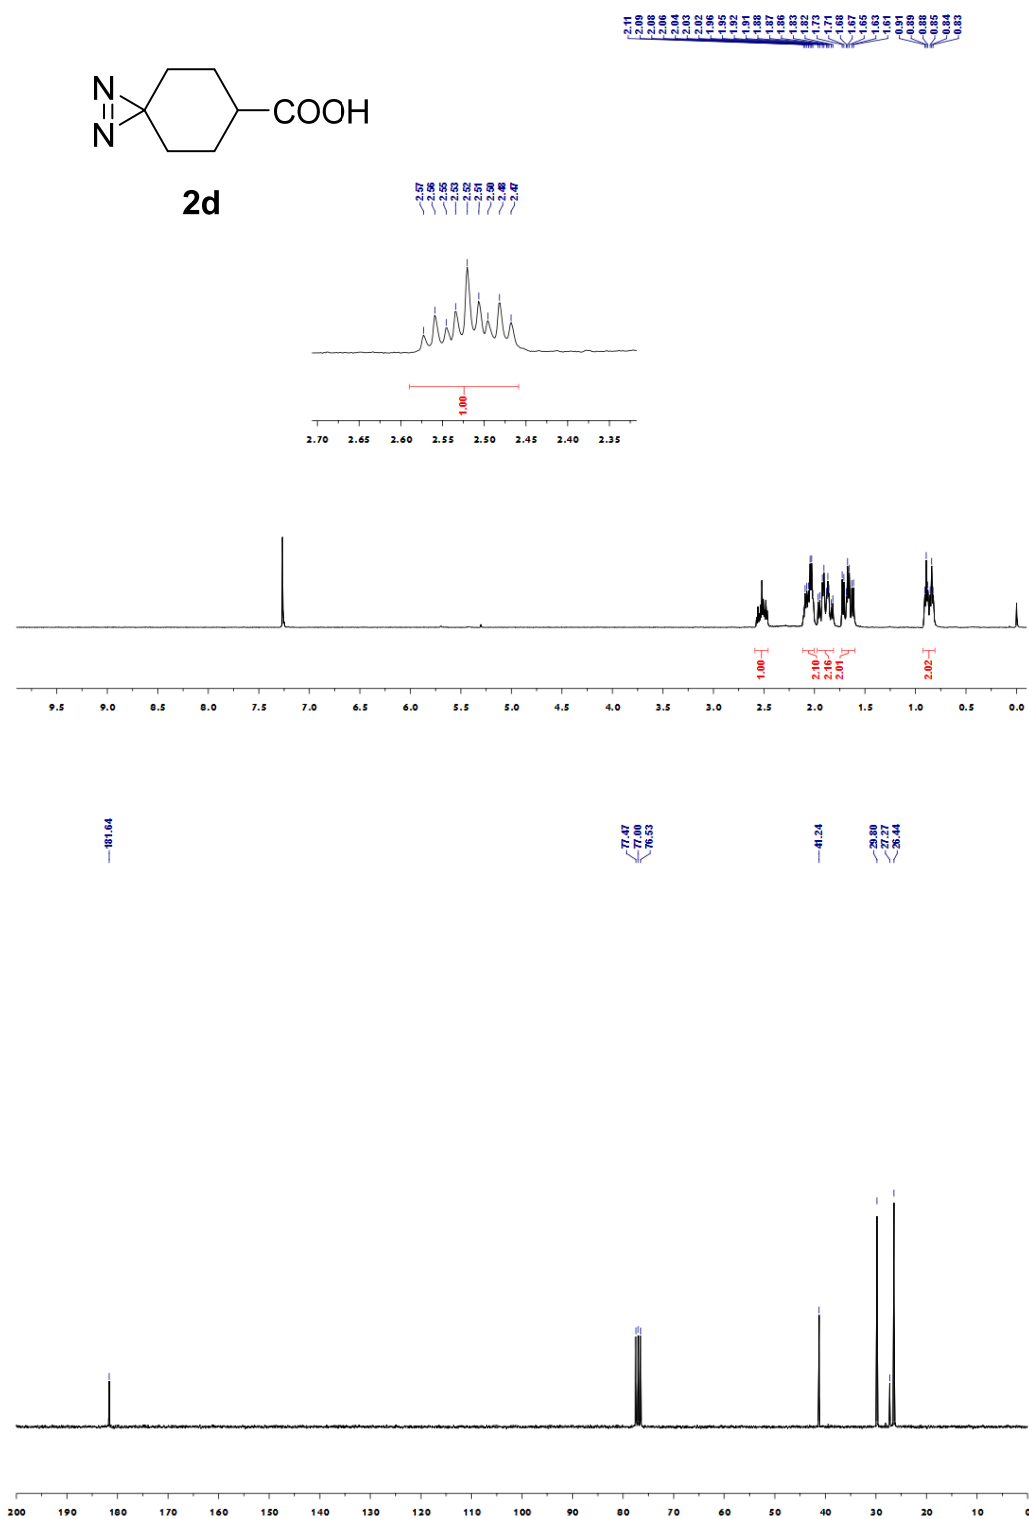

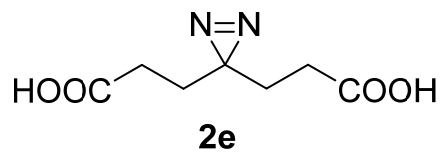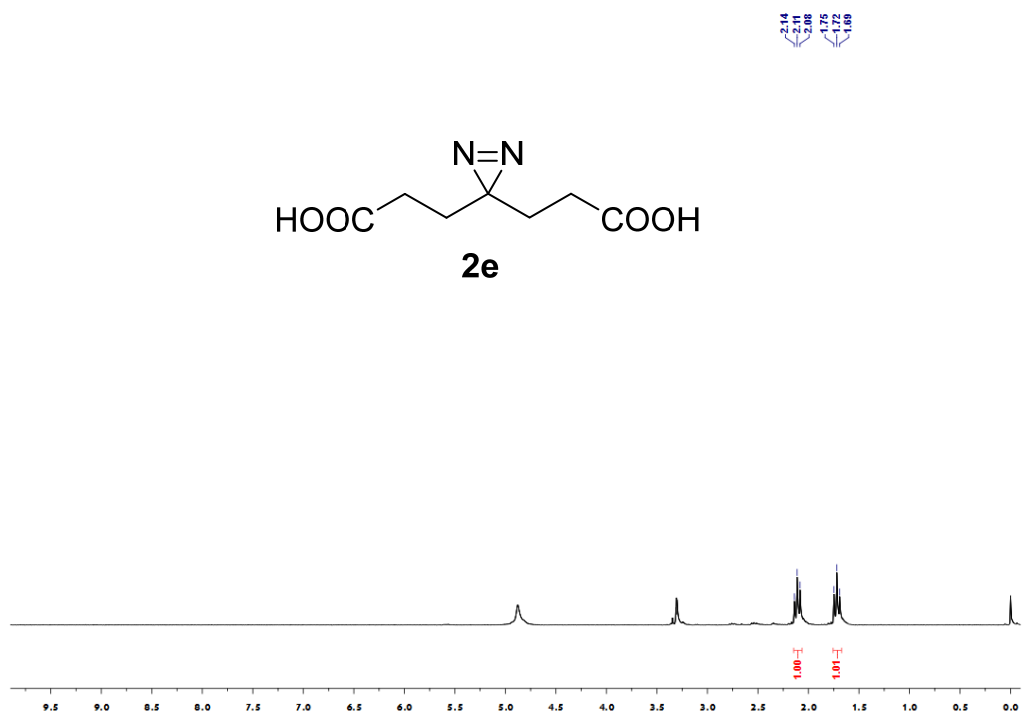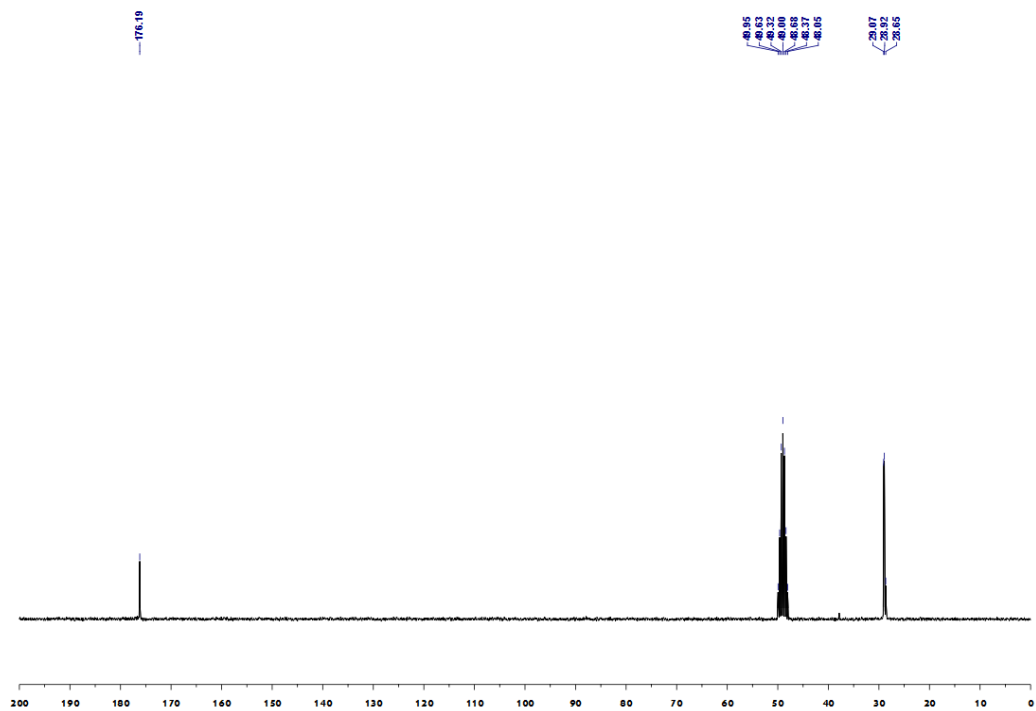

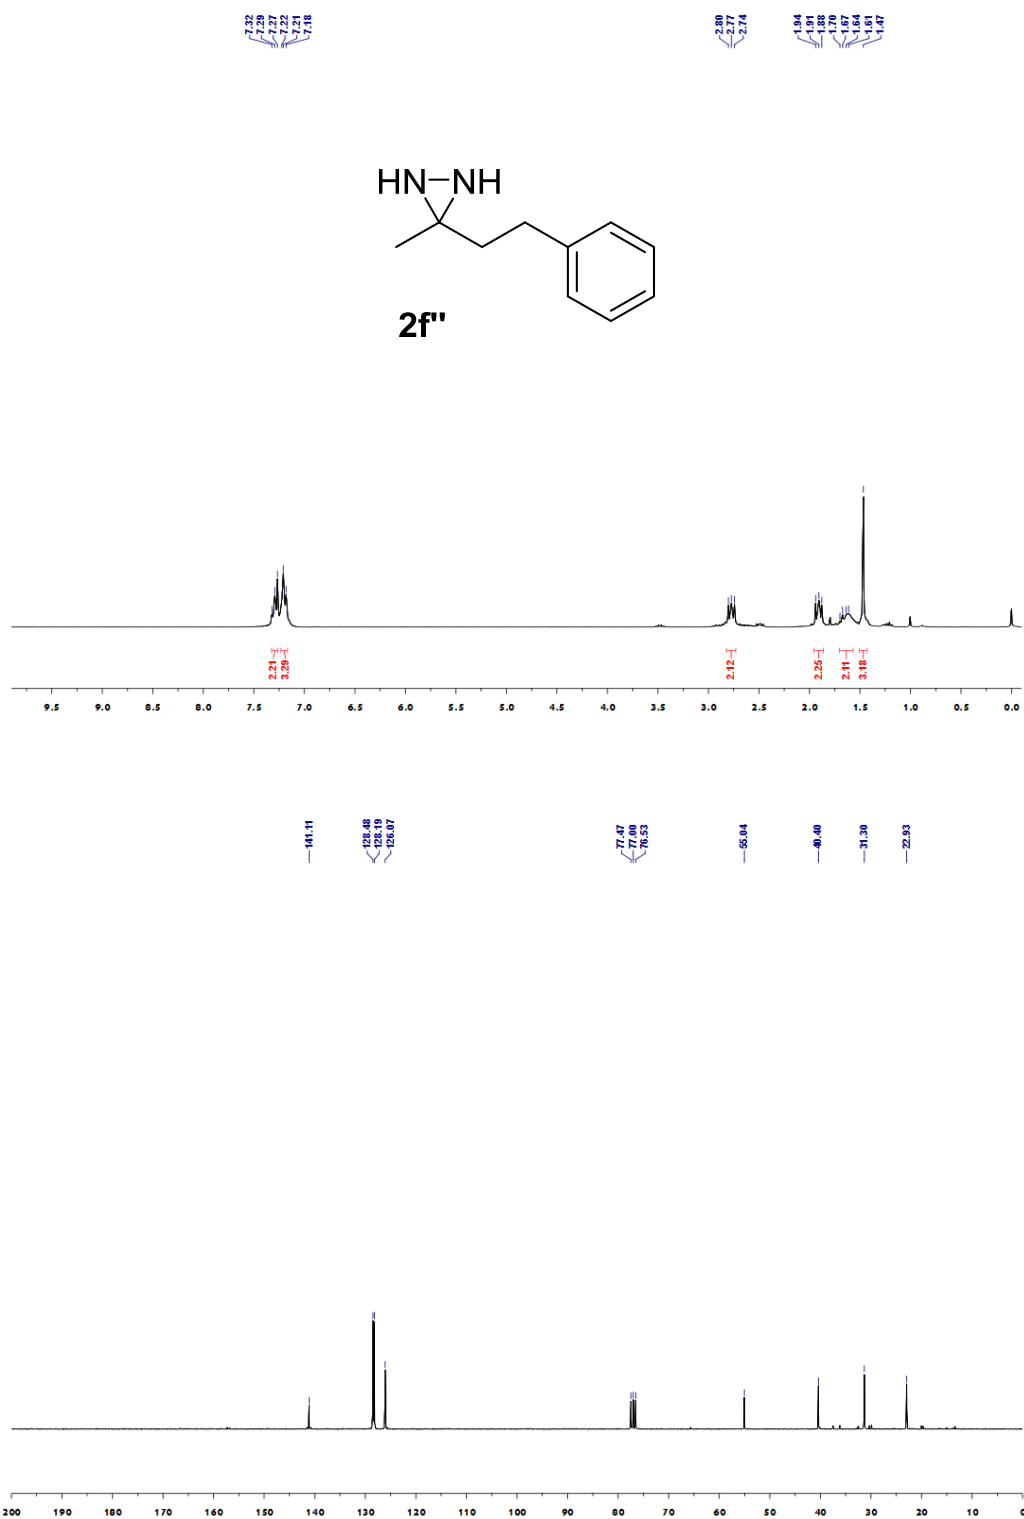

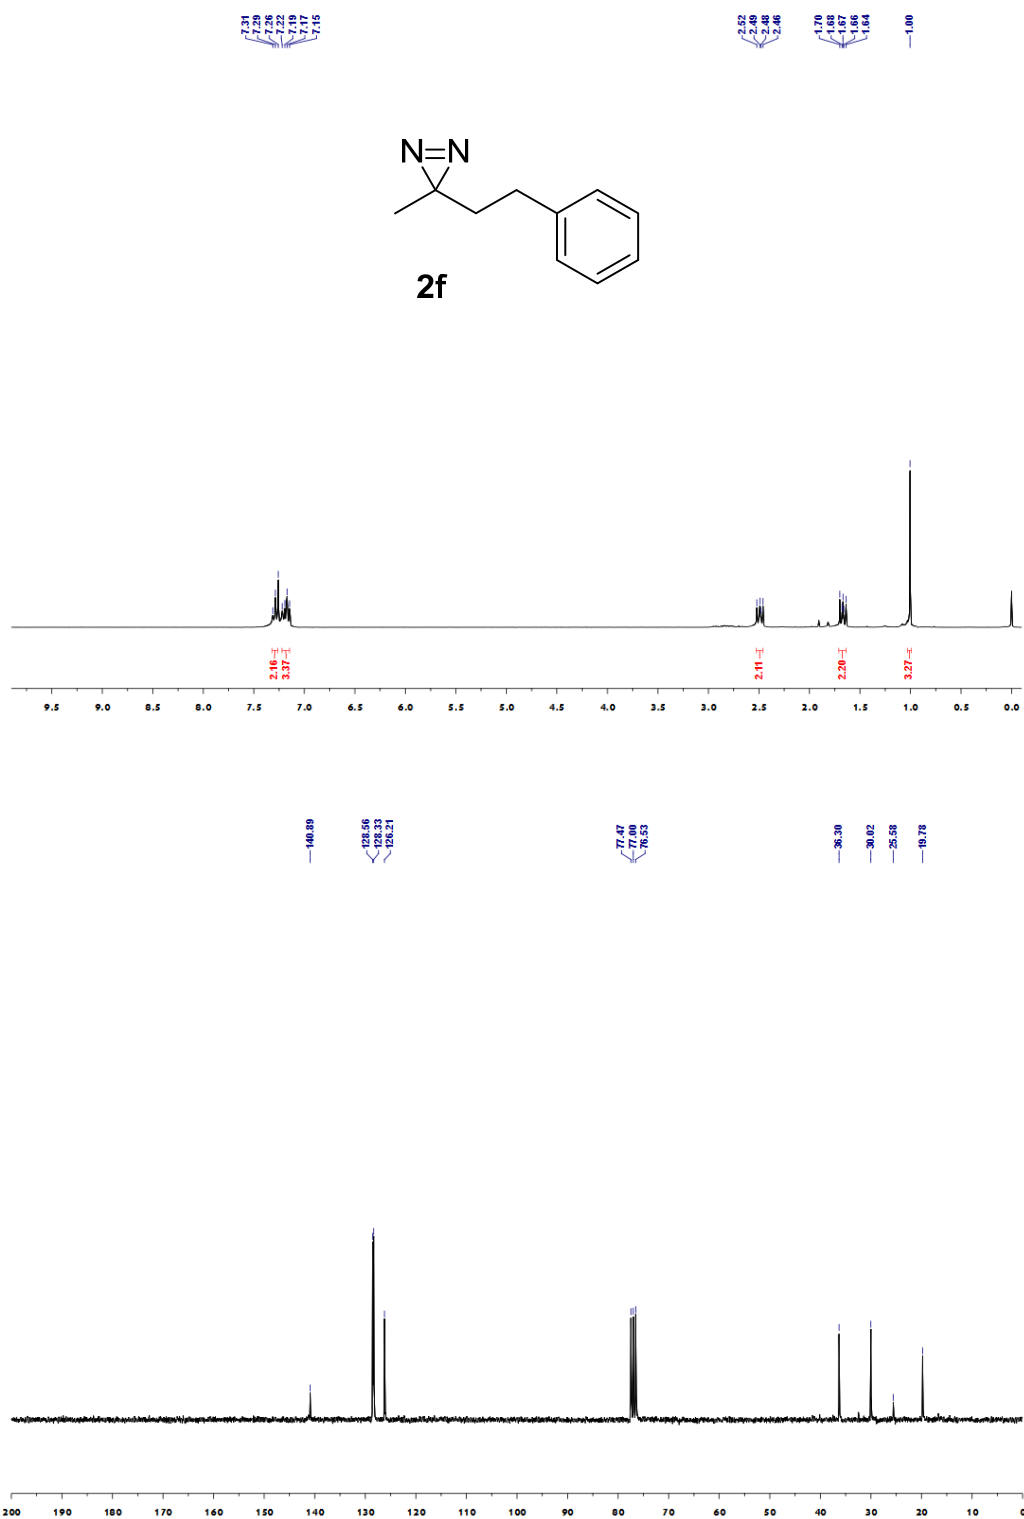



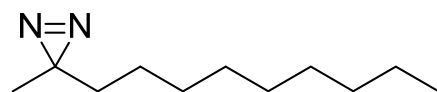

2g

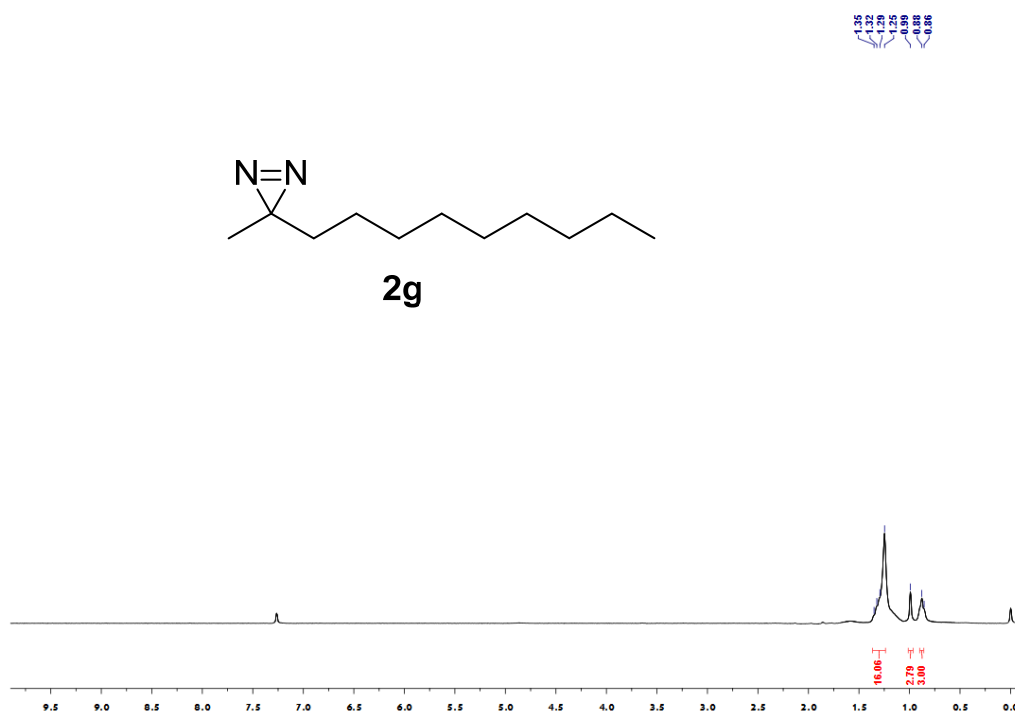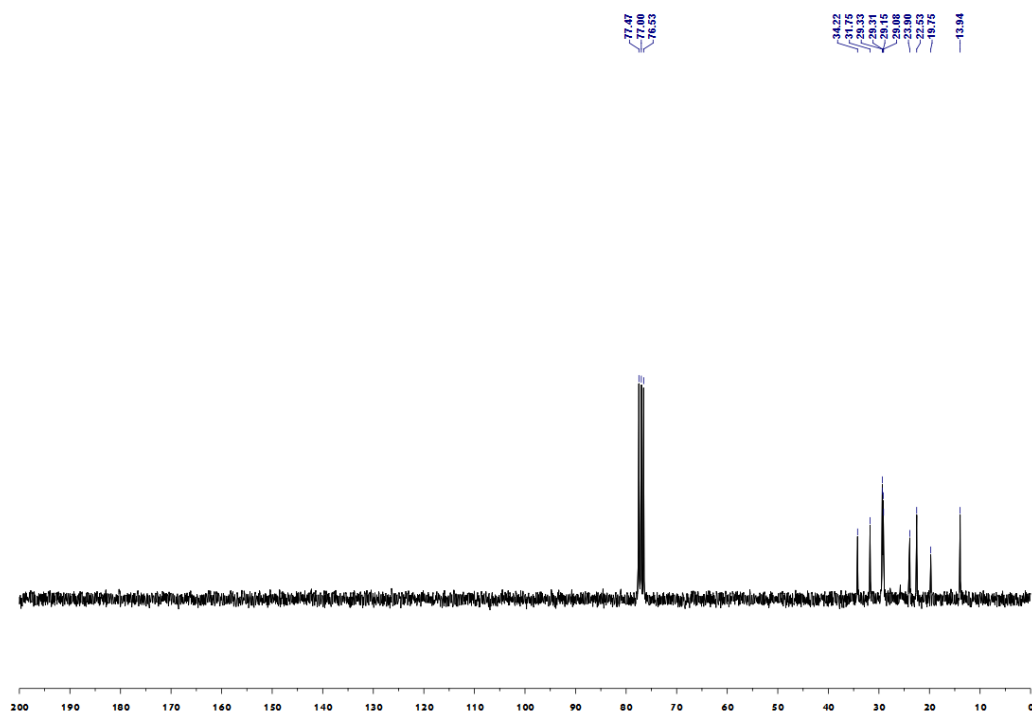

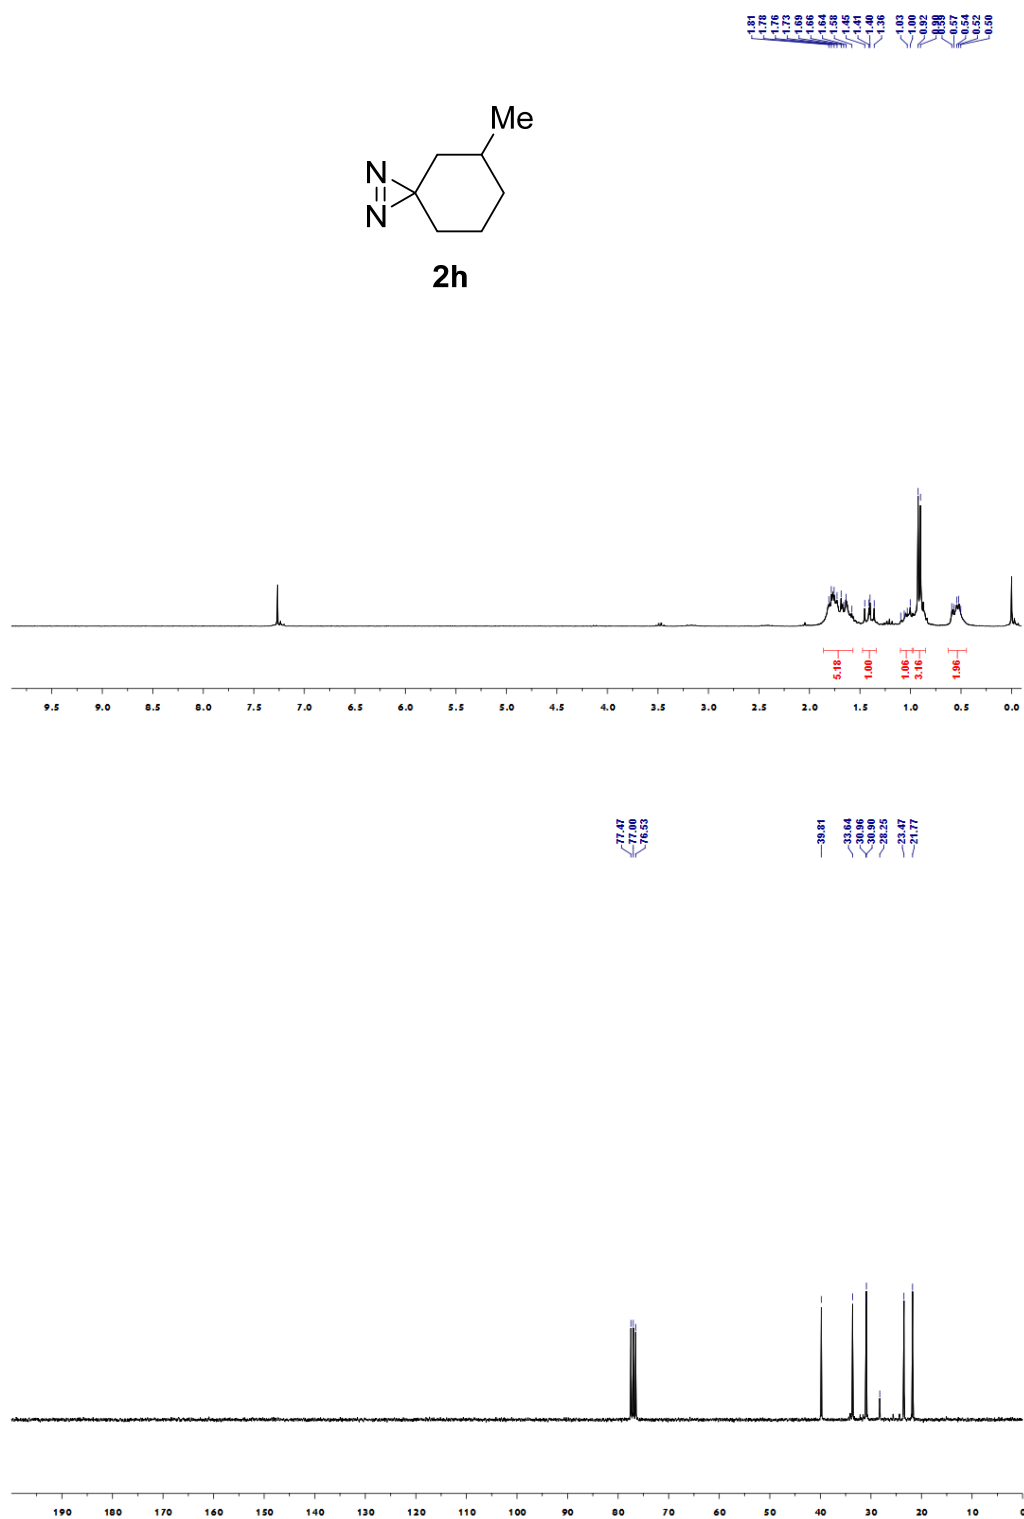

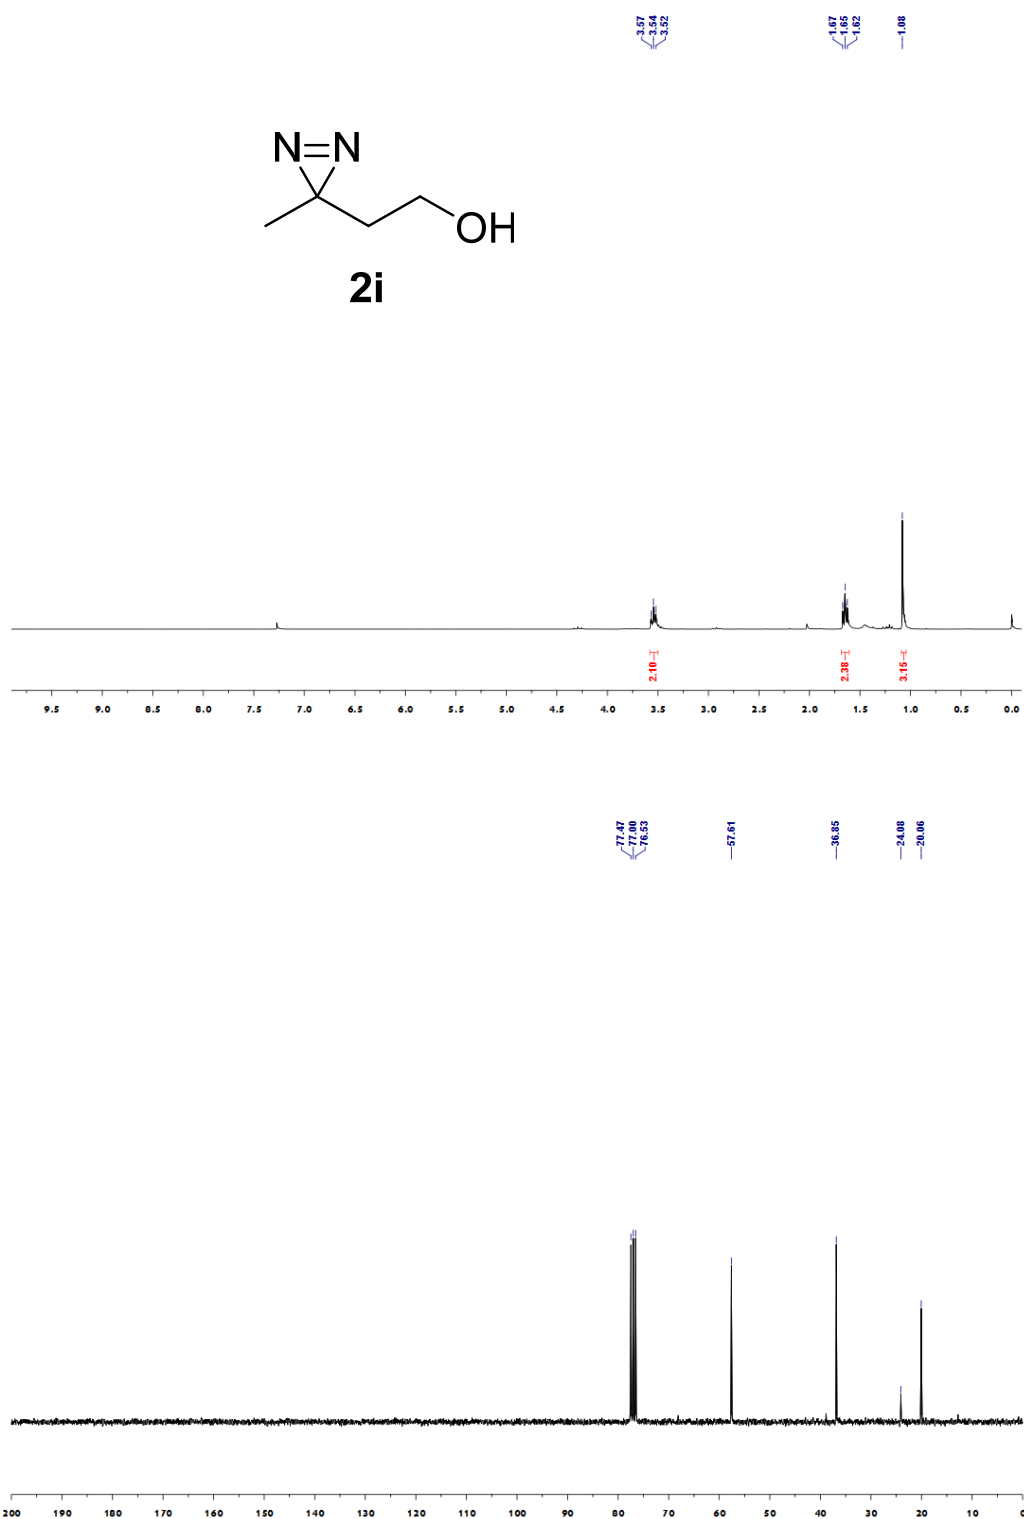

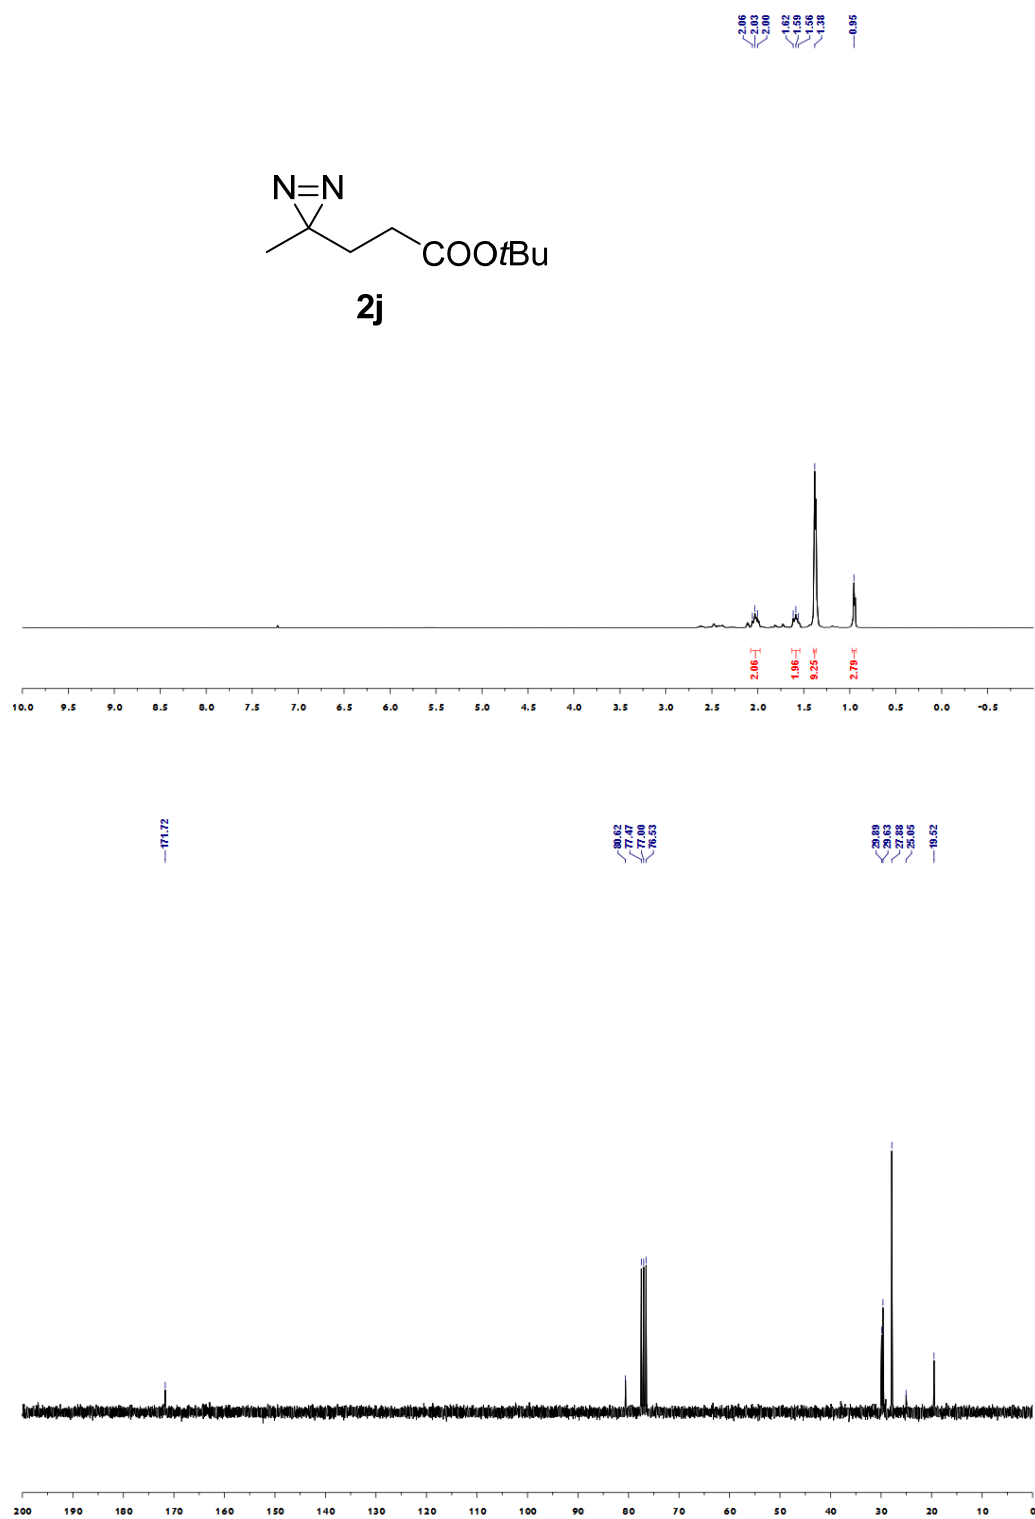

Supplement: s1 [file s1]
